# Supplementary material for: Functional Connectivity of Pain-Mediated Affect Regulation in Borderline Personality Disorder
Source: PLoS One. 2012 Mar 12;7(3):e33293. doi: 10.1371/journal.pone.0033293 (PMC3299768; doi:10.1371/journal.pone.0033293)
Supplement: Table S3 — Full Factorial Analysis PPI, left Insula, all significant effects. (XLS) [file pone.0033293.s003.xls]

## Sheet: Table S3
Table S3. Full Factorial Analysis PPI left Insula, all significant effects
			peak	peak	peak	peak
			p(FWE)	p(FDR)	p(unc)	quivZ	MNI
Effect	Brodmann Area	AAL					x	y	z
ME valence
		Claustrum	0	0	0	6.043	-30	12	9
	BA34	Parahippocampal Gyrus	0	0	0	5.618	-21	3	-18
	BA40	Inferior Parietal Lobule	0	0	0	7.349	-57	-39	39
	BA13	Insula	0	0	0	7.144	-57	-39	21
	BA13	Superior Temporal Gyrus	0.001	0	0	5.548	60	-42	18
	BA40	Inferior Parietal Lobule	0.001	0	0	5.524	66	-42	33
	BA18	Cuneus	0	0	0	6.12	-15	-72	12
	BA46	Middle Frontal Gyrus	0	0	0	6.092	-42	39	27
	BA10	Middle Frontal Gyrus	0	0	0	5.765	-36	45	15
	BA4	Precentral Gyrus	0	0	0	5.881	51	-18	39
	BA31	Cingulate Gyrus	0	0	0	5.813	6	-30	45
	BA31	Cingulate Gyrus	0.002	0	0	5.282	-9	-30	45
	BA45	Inferior Frontal Gyrus	0	0	0	5.685	-60	12	24
	BA4	Precentral Gyrus	0	0	0	5.591	-30	-30	66
	BA40	Postcentral Gyrus	0.03	0	0	4.716	-30	-39	57
	BA37	Fusiform Gyrus	0.001	0	0	5.532	-39	-54	-24
	BA24	Cingulate Gyrus	0.001	0	0	5.377	-6	3	45
	BA32	Medial Frontal Gyrus	0.003	0	0	5.245	3	3	48
	BA24	Cingulate Gyrus	0.014	0	0	4.9	6	-6	48
	BA7	Precuneus	0.002	0	0	5.333	12	-75	42
	BA38	Superior Temporal Gyrus	0.003	0	0	5.242	48	15	-12
	BA22	Superior Temporal Gyrus	0.013	0	0	4.914	57	12	-6
		Thalamus	0.003	0	0	5.206	-15	-6	15
		Thalamus	0.016	0	0	4.859	-3	-9	9
	BA3	Postcentral Gyrus	0.004	0	0	5.144	-42	-21	57
	BA32	Anterior Cingulate	0.009	0	0	4.978	6	39	21
IE group x valence
	Putamen	Lentiform Nucleus	0.717	0.94	0	3.728	27	-9	-6
	BA 18	Lingual Gyrus	0.939	0.94	0	3.472	-12	-66	3
IE group x valence x temperature
	Putamen	Putamen	0.738	0.475	0	3.71	27	-9	6
	BA 7	Precuneus	0.945	0.475	0	3.46	3	-60	30
